# Supplementary material
Source: Springer Nature journal article supplement (https://www.springermedizin.de/resource/supplementary/12987_2013_79_MOESM2_ESM.pdf/9680284)
Supplement: MOESM2 [file 9680284]

**Table S2. TNF $\alpha$  and IFN $\gamma$ -induced modulation of transcripts related to BBB permeability**

| <b>Structural tight junctions</b>    |               |                                  |                  |
|--------------------------------------|---------------|----------------------------------|------------------|
| <b>ACCESSION</b>                     | <b>SYMBOL</b> | <b>FOLD-CHANGE OR REGULATION</b> | <b>ADJ.P.VAL</b> |
| NM_003277.2                          | CLDN5         | -2.086                           | 0.006518769      |
| NM_032801.3                          | JAM3          | -1.577                           | 0.000226073      |
| NM_014343.1                          | CLDN15        | -1.530                           | 7.59E-05         |
| NM_152353.1                          | CLDND2        | -                                | 0.003523584      |
| NM_144724.1                          | MARVELD2      | -                                | 0.01440481       |
| NM_021101.3                          | CLDN1         | 3.190                            | 1.13E-05         |
| NM_012129.2                          | CLDN12        | 1.274                            | 0.01151853       |
| NM_194284.2                          | CLDN23        | 1.519                            | 0.000742419      |
| NM_001307.3                          | CLDN7         | 1.432                            | 0.001070304      |
| NM_144504.1                          | JAM1          | 1.337                            | 0.011583927      |
| NM_016946.3                          | JAM1          | +                                | 0.002479634      |
| NM_012130.2                          | CLDN14        | N                                | 0.173320936      |
| NM_001001346.2                       | CLDN20        | N                                | 0.772348864      |
| NM_001040181.1                       | CLDND1        | N                                | 0.500496117      |
| NM_001040181.1                       | CLDND1        | N                                | 0.663446269      |
| <b>Structural adherens junctions</b> |               |                                  |                  |
| <b>ACCESSION</b>                     | <b>SYMBOL</b> | <b>FOLD-CHANGE OR REGULATION</b> | <b>ADJ.P.VAL</b> |
| NM_001792.2                          | CDH2          | -1.764                           | 8.45E-05         |
| NM_001795.2                          | CDH5          | -1.944                           | 0.000393004      |
| NM_015480.1                          | PVRL3         | -1.713                           | 4.40E-05         |
| NM_001042724.1                       | PVRL2         | 2.781                            | 3.37E-07         |
| NM_002856.2                          | PVRL2         | 2.577                            | 1.02E-06         |
| NM_001042724.1                       | PVRL2         | 2.443                            | 2.10E-06         |
| <b>Gap junctions</b>                 |               |                                  |                  |
| <b>ACCESSION</b>                     | <b>SYMBOL</b> | <b>FOLD-CHANGE OR REGULATION</b> | <b>ADJ.P.VAL</b> |
| NM_000165.3                          | GJA1          | -1.710                           | 0.00441142       |
| NM_005266.4                          | GJA5          | +                                | 0.027873225      |
| <b>Cytoplasmic tight junctions</b>   |               |                                  |                  |
| <b>ACCESSION</b>                     | <b>SYMBOL</b> | <b>FOLD-CHANGE OR REGULATION</b> | <b>ADJ.P.VAL</b> |
| NM_001002857.1                       | ANXA2         | -1.634                           | 1.31E-05         |
| NM_001002858.1                       | ANXA2         | -1.393                           | 0.001044011      |
| NM_001002857.1                       | ANXA2         | -1.277                           | 0.016785097      |
| NM_018054.4                          | *ARHGAP17     | -1.225                           | 0.015350988      |
| NM_000075.2                          | CDK4          | -1.479                           | 8.62E-05         |

|                                       |               |                                  |                  |
|---------------------------------------|---------------|----------------------------------|------------------|
| NM_022474.2                           | MPP5          | -1.255                           | 0.005262576      |
| NM_001037281.1                        | *PARD6A       | -1.503                           | 0.000216379      |
| NM_000314.4                           | PTEN          | -1.632                           | 3.18E-05         |
| NM_002867.2                           | RAB3B         | -1.291                           | 0.006151095      |
| NM_080604.1                           | TJAP1         | -1.367                           | 0.005183602      |
| NM_133646.2                           | ZAK           | -2.784                           | 2.23E-06         |
| NM_016653.2                           | ZAK           | -1.290                           | 0.001124454      |
| NM_018054.4                           | *ARHGAP17     | 1.396                            | 0.001435095      |
| NM_032866.3                           | CGNL1         | 1.404                            | 0.002714655      |
| NM_002870.2                           | RAB13         | 1.139                            | 0.082771835      |
| NM_004819.2                           | SYMPK         | 1.251                            | 0.002643408      |
| NM_175610.2                           | *TJP1         | 1.271                            | 0.002446291      |
| NM_016948.2                           | *PARD6A       | N                                | 0.137275818      |
| NR_001562.1                           | ANXA2P1       | N                                | 0.84613659       |
| NM_003257.3                           | *TJP1         | N                                | 0.21981928       |
| NM_004817.2                           | TJP2          | N                                | 0.445415986      |
| NM_201629.1                           | TJP2          | N                                | 0.232800829      |
| NM_032387.3                           | WNK4          | N                                | 0.94206841       |
| <b>Cytoplasmic adherens junctions</b> |               |                                  |                  |
| <b>ACCESSION</b>                      | <b>SYMBOL</b> | <b>FOLD-CHANGE OR REGULATION</b> | <b>ADJ.P.VAL</b> |
| NM_001903.2                           | CTNNA1        | -1.393                           | 0.00055142       |
| NM_003798.1                           | CTNNAL1       | -1.348                           | 0.001586702      |
| NM_020248.2                           | CTNNBIP1      | -1.491                           | 0.000365347      |
| NM_002230.1                           | *JUP          | -1.532                           | 0.002773573      |
| NM_015356.3                           | *SCRIB        | -1.587                           | 0.000439375      |
| NM_030877.3                           | CTNNBL1       | 2.067                            | 1.92E-06         |
| NM_001098209.1                        | CTNNB1        | N                                | 0.075733212      |
| NM_001085458.1                        | CTNND1        | N                                | 0.821672833      |
| NM_021991.1                           | *JUP          | N                                | 0.059370165      |
| NM_002230.1                           | *JUP          | N                                | 0.88181532       |
| NM_001005242.1                        | PKP2          | N                                | 0.726001649      |
| NM_015356.3                           | *SCRIB        | N                                | 0.073029717      |
| <b>Desmosomal</b>                     |               |                                  |                  |
| <b>ACCESSION</b>                      | <b>SYMBOL</b> | <b>FOLD-CHANGE OR REGULATION</b> | <b>ADJ.P.VAL</b> |
| NM_003628.3                           | PKP4          | -1.462                           | 0.000734378      |
| NM_001005242.1                        | PKP2          | N                                | 0.726001649      |
| <b>Less known</b>                     |               |                                  |                  |
| <b>ACCESSION</b>                      | <b>SYMBOL</b> | <b>FOLD-CHANGE OR REGULATION</b> | <b>ADJ.P.VAL</b> |
| NM_002436.2                           | MPP1          | -1.621                           | 4.84E-05         |
| NM_175573.1                           | *ADRM1        | 1.490                            | 0.000372749      |
| NM_001042486.1                        | DLGAP4        | 1.831                            | 3.04E-05         |

| NM_183006.2                                                    | DLGAP4        | +                                | 0.000555124      |
|----------------------------------------------------------------|---------------|----------------------------------|------------------|
| NM_175573.1                                                    | *ADRM1        | N                                | 0.097286675      |
| NM_018979.2                                                    | WNK1          | N                                | 0.1944283        |
| <b>Cell-cell and cell-matrix adhesion regulatory molecules</b> |               |                                  |                  |
| <b>ACCESSION</b>                                               | <b>SYMBOL</b> | <b>FOLD-CHANGE OR REGULATION</b> | <b>ADJ.P.VAL</b> |
| NM_002473.3                                                    | MYH9          | -1.262                           | 0.003504242      |
| NM_002737.2                                                    | PRKCA         | -2.240                           | 1.43E-05         |
| NM_145040.2                                                    | PRKCDBP       | -1.622                           | 0.002914552      |
| NM_005400.2                                                    | PRKCE         | -1.328                           | 0.005357462      |
| NM_006255.3                                                    | PRKCH         | -1.634                           | 0.000626576      |
| NM_001001329.1                                                 | *PRKCSH       | -1.288                           | 0.002282669      |
| NM_006908.3                                                    | RAC1          | -1.303                           | 0.001496582      |
| NM_006254.3                                                    | PRKCD         | 1.521                            | 0.000400994      |
| NM_001001329.1                                                 | *PRKCSH       | 1.239                            | 0.006727286      |
| NM_006097.3                                                    | MYL9          | N                                | 0.925567532      |
| NM_002740.5                                                    | PRKCI         | N                                | 0.232800829      |
| NM_006257.2                                                    | PRKCQ         | N                                | 0.237578572      |
| <b>Focal adhesion molecules</b>                                |               |                                  |                  |
| <b>ACCESSION</b>                                               | <b>SYMBOL</b> | <b>FOLD-CHANGE OR REGULATION</b> | <b>ADJ.P.VAL</b> |
| NM_000118.1                                                    | ENG           | -1.550                           | 0.003975044      |
| NM_000314.4                                                    | PTEN          | -1.632                           | 3.18E-05         |
| NM_001034954.1                                                 | SORBS1        | -1.469                           | 0.002387067      |
| NM_001040023.1                                                 | SIRPA         | -1.733                           | 6.89E-05         |
| NM_001567.2                                                    | INPPL1        | -1.275                           | 0.02243745       |
| NM_002211.2                                                    | ITGB1         | -1.615                           | 9.43E-05         |
| NM_002715.2                                                    | PPP2CA        | -1.426                           | 0.00058442       |
| NM_002737.2                                                    | PRKCA         | -2.240                           | 1.43E-05         |
| NM_002745.4                                                    | MAPK1         | -1.304                           | 0.005300108      |
| NM_002834.3                                                    | PTPN11        | -1.529                           | 0.000280123      |
| NM_002840.3                                                    | PTPRF         | -2.545                           | 1.71E-06         |
| NM_002890.1                                                    | RASA1         | -1.339                           | 0.000520442      |
| NM_003603.4                                                    | SORBS2        | -1.941                           | 0.0053419        |
| NM_004840.2                                                    | ARHGEF6       | -1.569                           | 0.000148197      |
| NM_004987.3                                                    | LIMS1         | -1.238                           | 0.007645093      |
| NM_005022.2                                                    | PFN1          | -1.258                           | 0.003484453      |
| NM_005157.3                                                    | ABL1          | -1.379                           | 0.000364235      |
| NM_005188.2                                                    | CBL           | -1.262                           | 0.014968071      |
| NM_005343.2                                                    | HRAS          | -1.542                           | 0.000381485      |
| NM_005507.2                                                    | CFL1          | -1.589                           | 0.000327233      |
| NM_005541.3                                                    | INPP5D        | -1.278                           | 0.002972738      |
| NM_005578.2                                                    | LPP           | -1.243                           | 0.045530455      |
| NM_005607.3                                                    | PTK2          | -1.452                           | 0.000402379      |
| NM_005633.2                                                    | SOS1          | -0.773                           | 0.002931232      |

|                |          |        |             |
|----------------|----------|--------|-------------|
| NM_005775.5    | SORBS5   | -1.462 | 0.000127175 |
| NM_006098.4    | GNB2L1   | -1.201 | 0.007904323 |
| NM_006148.1    | LASP1    | -1.435 | 0.000178301 |
| NM_006908.3    | RAC1     | -1.303 | 0.001496582 |
| NM_012383.3    | OSTF1    | -1.229 | 0.033866015 |
| NM_012398.1    | PIP5K1C  | -1.252 | 0.013761439 |
| NM_014000.2    | VCL      | -1.314 | 0.004007924 |
| NM_014288.3    | ITGB3BP  | -1.223 | 0.008476532 |
| NM_015927.3    | *TGFB1I1 | -1.172 | 0.02873836  |
| NM_030768.2    | ILKAP    | -1.202 | 0.006085583 |
| NM_031892.1    | SH3KBP1  | -1.438 | 0.000488666 |
| NM_031892.1    | SH3KBP1  | -1.253 | 0.005463696 |
| NM_032349.2    | NUDT16L1 | -1.281 | 0.003187908 |
| NM_032876.4    | JUB      | -1.308 | 0.00348688  |
| NM_033669.1    | ITGB1    | -1.487 | 8.47E-05    |
| NM_130440.1    | PTPRF    | -1.731 | 0.000145252 |
| NM_144641.1    | PPM1M    | -1.491 | 0.00035368  |
| NM_201557.2    | FHL2     | -3.372 | 3.00E-06    |
| NM_001024227.1 | *ARF1    | -1.417 | 0.001168351 |
| NM_002205.2    | ITGA5    | -1.412 | 0.001895908 |
| NM_201555.1    | FHL2     | -2.985 | 1.19E-05    |
| NM_014800.9    | ELMO1    | -      | 0.006460642 |
| NM_182966.2    | NEDD9    | -      | 0.034363415 |
| NM_001005361.1 | DNM2     | 1.578  | 7.68E-05    |
| NM_001005376.1 | PLAUR    | 1.426  | 0.002664706 |
| NM_001005376.1 | PLAUR    | 2.018  | 4.92E-06    |
| NM_001007067.1 | SDCBP    | 1.994  | 6.22E-05    |
| NM_001009944.1 | *PKD1    | 1.346  | 0.005494299 |
| NM_001014794.1 | ILK      | 1.648  | 0.000762502 |
| NM_001024912.1 | CEACAM1  | 5.388  | 3.22E-08    |
| NM_001024912.1 | CEACAM1  | 6.520  | 5.56E-08    |
| NM_001030002.1 | GRB7     | 1.367  | 0.000686216 |
| NM_001101.2    | ACTB     | 1.190  | 0.038649507 |
| NM_001101.2    | ACTB     | 1.345  | 0.003744627 |
| NM_001102.2    | ACTN1    | 1.823  | 2.09E-05    |
| NM_001380.3    | DOCK1    | 1.291  | 0.00404949  |
| NM_002037.3    | FYN      | 1.534  | 7.13E-05    |
| NM_002350.1    | LYN      | 2.762  | 2.93E-05    |
| NM_002356.5    | MARCKS   | 3.090  | 7.00E-06    |
| NM_002613.3    | PDPK1    | 1.221  | 0.02789832  |
| NM_002659.2    | PLAUR    | 1.873  | 7.67E-06    |
| NM_002999.2    | SDC4     | 2.088  | 6.69E-06    |
| NM_003029.3    | *SHC1    | 1.595  | 0.000179266 |
| NM_003461.4    | *ZYX     | 1.610  | 0.00017673  |
| NM_004343.2    | CALR     | 1.877  | 0.000347059 |
| NM_004945.2    | DNM2     | 1.265  | 0.01216074  |

|                |          |       |             |
|----------------|----------|-------|-------------|
| NM_005251.2    | CTTN     | 1.412 | 0.000149676 |
| NM_007118.2    | TRIO     | 1.161 | 0.028280631 |
| NM_012289.3    | KEAP1    | 1.167 | 0.037837545 |
| NM_012289.3    | KEAP1    | 1.243 | 0.003418584 |
| NM_013327.3    | PARVB    | 1.292 | 0.009697523 |
| NM_014030.3    | GIT1     | 1.266 | 0.008369366 |
| NM_080422.1    | PTPN2    | 1.702 | 3.68E-05    |
| NM_080840.2    | PTPRA    | 1.669 | 3.87E-05    |
| NM_080841.2    | PTPRA    | 1.287 | 0.009354278 |
| NM_133452.1    | RAVER1   | 1.186 | 0.017037939 |
| NM_138565.1    | CTTN     | 1.230 | 0.011990068 |
| NM_138957.2    | *MAPK1   | 1.250 | 0.006030541 |
| NM_153047.1    | FYN      | 1.321 | 0.002273278 |
| NM_153047.1    | FYN      | 1.373 | 0.00126248  |
| NM_153048.1    | FYN      | 1.374 | 0.00169859  |
| NM_198291.1    | SRC      | 1.479 | 0.019884085 |
| NM_198793.2    | CD47     | 1.760 | 5.64E-05    |
| NM_213662.1    | STAT3    | 2.032 | 3.95E-06    |
| NM_018212.4    | ENAH     | +     | 0.000108801 |
| NM_002842.2    | PTPRH    | +     | 0.010259729 |
| NM_016735.1    | LIMK1    | +     | 0.007277601 |
| NM_080548.3    | PTPN6    | +     | 0.000861258 |
| NM_198679.1    | *RAPGEF1 | +     | 0.023215649 |
| NM_001712.3    | CEACAM1  | +     | 9.98E-08    |
| NM_001777.3    | CD47     | +     | 0.002002172 |
| NM_173176.1    | PTK2B    | +     | 0.000603398 |
| NM_001009944.1 | *PKD1    | N     | 0.204714631 |
| NM_001012751.1 | ABI1     | N     | 0.112867902 |
| NM_001014431.1 | AKT1     | N     | 0.428090371 |
| NM_001014432.1 | AKT1     | N     | 0.614732784 |
| NM_001024215.1 | FBLIM1   | N     | 0.419750606 |
| NM_001024228.1 | *ARF1    | N     | 0.844816268 |
| NM_001040439.1 | MAPK8IP3 | N     | 0.602397655 |
| NM_001042669.1 | ARHGAP24 | N     | 0.089744057 |
| NM_001540.2    | HSPB1    | N     | 0.305812639 |
| NM_001664.2    | RHOA     | N     | 0.163803357 |
| NM_001753.3    | CAV1     | N     | 0.537110186 |
| NM_002086.3    | GRB2     | N     | 0.111551053 |
| NM_002086.3    | GRB2     | N     | 0.360850757 |
| NM_002568.3    | PABPC1   | N     | 0.106303017 |
| NM_002662.2    | PLD1     | N     | 0.472204154 |
| NM_002827.2    | PTPN1    | N     | 0.896460364 |
| NM_002835.2    | PTPN12   | N     | 0.252203962 |
| NM_002859.1    | PXN      | N     | 0.506933977 |
| NM_003029.3    | *SHC1    | N     | 0.709483874 |
| NM_003047.2    | SLC9A1   | N     | 0.061360242 |

|             |          |   |             |
|-------------|----------|---|-------------|
| NM_003302.2 | IRIP6    | N | 0.42889/626 |
| NM_003370.3 | VASP     | N | 0.215638649 |
| NM_003373.3 | VCL      | N | 0.624753153 |
| NM_003380.2 | VIM      | N | 0.386599257 |
| NM_003461.4 | *ZYX     | N | 0.106684709 |
| NM_003567.2 | BCAR3    | N | 0.929493241 |
| NM_003626.2 | PPFIA1   | N | 0.881184849 |
| NM_004078.1 | CSRP1    | N | 0.850706868 |
| NM_004103.3 | PTK2B    | N | 0.333261543 |
| NM_004383.1 | CSK      | N | 0.630174165 |
| NM_004517.2 | ILK      | N | 0.102913089 |
| NM_004811.1 | LPXN     | N | 0.112462183 |
| NM_004986.2 | KTNI     | N | 0.122708036 |
| NM_005186.2 | CAPN1    | N | 0.063157228 |
| NM_005231.2 | *CTTN    | N | 0.074725558 |
| NM_005406.2 | ROCK1    | N | 0.40201846  |
| NM_005544.1 | IRS1     | N | 0.163857962 |
| NM_005731.2 | ARPC2    | N | 0.122708036 |
| NM_006218.2 | PIK3CA   | N | 0.264232251 |
| NM_006285.2 | TESK1    | N | 0.119267193 |
| NM_006289.2 | TLN1     | N | 0.288554931 |
| NM_006403.2 | NEDD9    | N | 0.182655248 |
| NM_007313.2 | ABL1     | N | 0.59260795  |
| NM_014567.2 | BCAR1    | N | 0.942230601 |
| NM_015385.2 | SORBS1   | N | 0.584573262 |
| NM_015927.3 | *TGFB1I1 | N | 0.060748342 |
| NM_016081.3 | PALLD    | N | 0.229530611 |
| NM_016823.2 | CRK      | N | 0.404508177 |
| NM_016823.2 | CRK      | N | 0.94902115  |
| NM_018222.2 | PARVA    | N | 0.073119041 |
| NM_021979.2 | HSPA2    | N | 0.557673767 |
| NM_022648.3 | TNS1     | N | 0.722009512 |
| NM_031268.4 | PDPK1    | N | 0.401427859 |
| NM_031305.2 | ARHGAP24 | N | 0.134836292 |
| NM_031305.2 | ARHGAP24 | N | 0.424925028 |
| NM_080792.2 | SIRPA    | N | 0.701909421 |
| NM_138957.2 | *MAPK1   | N | 0.559872758 |
| NM_144573.3 | NEXN     | N | 0.120713601 |
| NM_177423.1 | PPFIA1   | N | 0.467308111 |
| NM_177423.1 | PPFIA1   | N | 0.684812784 |
| NM_182811.1 | PLCG1    | N | 0.080232319 |
| NM_182811.1 | PLCG1    | N | 0.091308098 |
| NM_182926.2 | KTNI     | N | 0.08562298  |
| NM_198679.1 | *RAPGEF1 | N | 0.096612205 |

**Integrins**

| ACCESSION      | SYMBOL   | FOLD-CHANGE OR REGULATION | ADJ.P.VAL   |
|----------------|----------|---------------------------|-------------|
| NM_002203.3    | ITGA2    | -1.289                    | 0.008224136 |
| NM_002213.3    | ITGB5    | -3.933                    | 7.97E-08    |
| NM_002213.3    | ITGB5    | -2.939                    | 2.31E-07    |
| NM_003637.3    | ITGA10   | -1.477                    | 0.004964577 |
| NM_018463.2    | ITFG2    | -1.354                    | 0.000506939 |
| NM_022334.3    | ITGB1BP1 | -1.486                    | 0.001005761 |
| NM_033668.1    | ITGB1    | -1.648                    | 2.98E-05    |
| NM_000210.2    | ITGA6    | -                         | 0.000848493 |
| NM_001005619.1 | ITGB4    | -                         | 3.19E-05    |
| NM_181501.1    | ITGA1    | -                         | 0.001461038 |
| NM_002210.2    | ITGAV    | 1.408                     | 0.000348199 |
| NM_000211.2    | ITGB2    | N                         | 0.101053652 |
| NM_000212.2    | ITGB3    | N                         | 0.056217426 |
| NM_002204.1    | ITGA3    | N                         | 0.445418908 |
| NM_002208.4    | ITGAE    | N                         | 0.115840878 |
| NM_004763.3    | ITGB1BP1 | N                         | 0.814806184 |
| NM_032039.1    | ITFG3    | N                         | 0.103667795 |
| NM_181469.1    | ITGB4BP  | N                         | 0.178223145 |

**Solute carriers**

| ACCESSION      | SYMBOL     | FOLD-CHANGE OR REGULATION | ADJ.P.VAL |
|----------------|------------|---------------------------|-----------|
| NM_003038.2    | SLC1A4     | -1.161                    | 0.0261998 |
| NM_020246.2    | SLC12A9    | -1.283                    | 0.0026724 |
| NM_004695.2    | SLC16A5    | -1.813                    | 0.0000073 |
| NM_005415.3    | SLC20A1    | -1.358                    | 0.0004818 |
| NM_006749.3    | SLC20A2    | -1.524                    | 0.0008527 |
| NM_007105.1    | SLC22A18AS | -1.362                    | 0.0026595 |
| NM_144712.2    | SLC23A3    | -1.295                    | 0.0055581 |
| NM_012140.3    | SLC25A10   | -1.508                    | 0.0000428 |
| NM_003951.2    | *SLC25A14  | -1.236                    | 0.0082199 |
| NM_006358.2    | SLC25A17   | -1.216                    | 0.0089357 |
| NM_021734.3    | SLC25A19   | -1.561                    | 0.0000706 |
| NM_024103.2    | SLC25A23   | -2.086                    | 0.0000026 |
| NM_052901.2    | *SLC25A25  | -1.165                    | 0.0223075 |
| NM_001039355.1 | *SLC25A29  | -1.284                    | 0.0060305 |
| NM_018155.1    | SLC25A36   | -1.206                    | 0.0382539 |
| NM_016016.1    | SLC25A39   | -1.610                    | 0.0000736 |
| NM_001151.2    | SLC25A4    | -1.497                    | 0.0000812 |
| NM_178526.1    | SLC25A42   | -1.680                    | 0.0000118 |
| NM_001152.1    | SLC25A5    | -1.373                    | 0.0003450 |
| XM_001132495.1 | SLC26A11   | -1.456                    | 0.0012279 |
| NM_134426.2    | SLC26A6    | -1.242                    | 0.0044100 |
| NM_198580.1    | SLC27A1    | -1.317                    | 0.0007227 |
| NM_024330.1    | SLC27A3    | -1.777                    | 0.0000167 |

|                |          |        |           |
|----------------|----------|--------|-----------|
| NM_0010/81/4.1 | ^SLC29A1 | -1.251 | 0.0135777 |
| NM_006516.1    | SLC2A1   | -1.860 | 0.0000760 |
| NM_020062.3    | SLC2A4RG | -1.517 | 0.0000689 |
| NM_014580.3    | SLC2A8   | -1.916 | 0.0000031 |
| NM_021194.2    | SLC30A1  | -1.292 | 0.0073565 |
| NM_022902.2    | SLC30A5  | -1.631 | 0.0000224 |
| NM_006345.3    | SLC30A9  | -1.543 | 0.0001645 |
| NM_017515.3    | SLC35F2  | -1.325 | 0.0063314 |
| NM_001467.4    | SLC37A4  | -1.627 | 0.0001123 |
| NM_030674.3    | SLC38A1  | -1.626 | 0.0005662 |
| NM_030674.3    | SLC38A1  | -1.280 | 0.0232198 |
| NM_020342.1    | SLC39A10 | -1.595 | 0.0000179 |
| NM_144564.4    | *SLC39A3 | -1.352 | 0.0007355 |
| NM_001008485.1 | SLC41A3  | -1.831 | 0.0000040 |
| NM_017836.3    | SLC41A3  | -1.588 | 0.0000348 |
| NM_080546.3    | *SLC44A1 | -1.947 | 0.0000025 |
| NM_020428.2    | SLC44A2  | -2.700 | 0.0000002 |
| NM_033102.2    | SLC45A3  | -1.491 | 0.0001324 |
| NM_181785.2    | SLC46A3  | -1.225 | 0.0478647 |
| NM_016615.2    | SLC6A13  | -1.156 | 0.0403559 |
| NM_182767.3    | SLC6A15  | -1.734 | 0.0000442 |
| NM_018057.4    | SLC6A15  | -1.280 | 0.0227109 |
| NM_182767.3    | SLC6A15  | -1.190 | 0.0185960 |
| NM_003045.3    | SLC7A1   | -1.646 | 0.0002440 |
| NM_003486.5    | SLC7A5   | -1.517 | 0.0053040 |
| NM_004252.2    | SLC9A3R1 | -1.372 | 0.0002678 |
| NM_005630.1    | SLCO2A1  | -2.326 | 0.0000242 |
| NM_012254.1    | SLC27A5  | -      | 0.0277369 |
| NM_145176.2    | SLC2A12  | -      | 0.0014351 |
| NM_000617.1    | *SLC11A2 | 1.335  | 0.0360691 |
| NM_016582.1    | *SLC15A3 | 3.003  | 0.0000011 |
| NM_003705.2    | SLC25A12 | 1.195  | 0.0126111 |
| NM_031212.3    | SLC25A28 | 2.100  | 0.0000100 |
| NM_016612.2    | SLC25A37 | 3.034  | 0.0000211 |
| NM_017875.1    | SLC25A38 | 1.142  | 0.0494433 |
| NM_138773.1    | SLC25A46 | 1.276  | 0.0398410 |
| NM_006931.1    | SLC2A3   | 1.631  | 0.0174551 |
| NM_017585.2    | SLC2A6   | 5.787  | 0.0000000 |
| NM_133496.3    | SLC30A7  | 1.307  | 0.0014251 |
| NM_001860.2    | SLC31A2  | 2.686  | 0.0000002 |
| NM_004733.2    | *SLC33A1 | 1.137  | 0.0376683 |
| NM_001032289.1 | *SLC35A2 | 1.180  | 0.0217454 |
| NM_080670.2    | SLC35A4  | 1.436  | 0.0002946 |
| NM_173073.2    | *SLC35C2 | 1.161  | 0.0332070 |
| NM_007001.1    | SLC35D2  | 1.166  | 0.0182932 |
| NM_018964.3    | SLC37A1  | 1.278  | 0.0076248 |



|                |           |       |           |
|----------------|-----------|-------|-----------|
| NM_032295.2    | *SLC3/A5  | 1.209 | 0.0276825 |
| NM_001037984.1 | *SLC38A10 | 1.139 | 0.0446279 |
| NM_033518.1    | SLC38A5   | 1.538 | 0.0000749 |
| NM_014437.3    | SLC39A1   | 1.299 | 0.0013815 |
| NM_015359.2    | SLC39A14  | 1.485 | 0.0007532 |
| NM_012319.2    | SLC39A6   | 1.247 | 0.0192512 |
| NM_014096.2    | SLC43A3   | 1.491 | 0.0004092 |
| NM_017611.2    | SLC43A3   | 1.855 | 0.0000221 |
| NM_033051.2    | SLC46A2   | 1.207 | 0.0115226 |
| NM_003040.2    | SLC4A2    | 1.347 | 0.0028388 |
| NM_021095.1    | SLC5A6    | 1.401 | 0.0001766 |
| NM_001008539.2 | SLC7A2    | 4.933 | 0.0000002 |
| NM_003982.2    | SLC7A7    | 1.379 | 0.0291232 |
| NM_016354.3    | SLC04A1   | 3.570 | 0.0000001 |
| NM_001032289.1 | *SLC35A2  | +     | 0.0302666 |
| NM_032148.2    | SLC41A2   | +     | 0.0000148 |
| NM_004785.3    | SLC9A3R2  | +     | 0.0000314 |
| NM_015945.10   | *SLC35C2  | N     | 0.0720592 |
| NM_019848.2    | SLC10A3   | N     | 0.5533214 |
| NM_001029998.2 | SLC10A7   | N     | 0.1320659 |
| NM_001046.2    | *SLC12A2  | N     | 0.1222428 |
| NM_005072.3    | SLC12A4   | N     | 0.3090568 |
| NM_022829.4    | *SLC13A3  | N     | 0.7075612 |
| NM_145648.1    | SLC15A4   | N     | 0.2676937 |
| NM_213606.1    | SLC16A12  | N     | 0.7482783 |
| NM_004207.2    | SLC16A3   | N     | 0.6702074 |
| NM_194255.1    | SLC19A1   | N     | 0.3001186 |
| NM_005628.1    | SLC1A5    | N     | 0.2172643 |
| NM_002555.3    | SLC22A18  | N     | 0.1248867 |
| NM_003059.2    | SLC22A4   | N     | 0.2243845 |
| NM_003060.2    | SLC22A5   | N     | 0.3506278 |
| NM_005847.3    | SLC23A1   | N     | 0.4033362 |
| NM_004727.2    | SLC24A1   | N     | 0.0729433 |
| NM_024959.2    | SLC24A6   | N     | 0.3357290 |
| NM_005984.1    | SLC25A1   | N     | 0.7569795 |
| NM_003562.3    | SLC25A11  | N     | 0.2111496 |
| NM_014251.1    | SLC25A13  | N     | 0.9144456 |
| NM_022810.1    | *SLC25A14 | N     | 0.2957475 |
| NM_024698.4    | SLC25A22  | N     | 0.2956596 |
| NM_013386.3    | SLC25A24  | N     | 0.0948117 |
| NM_052901.2    | *SLC25A25 | N     | 0.0563015 |
| NM_173471.2    | SLC25A26  | N     | 0.8582356 |
| NM_001009937.1 | SLC25A26  | N     | 0.2777276 |
| NM_001039355.1 | *SLC25A29 | N     | 0.1560603 |
| NM_002635.2    | SLC25A3   | N     | 0.0705441 |
| NM_201520.1    | SLC25A35  | N     | 0.5303580 |

|                |           |   |           |
|----------------|-----------|---|-----------|
| NM_018843.2    | SLC25A40  | N | 0.3330651 |
| NM_145305.1    | SLC25A43  | N | 0.0732068 |
| NM_014655.1    | SLC25A44  | N | 0.8671586 |
| NM_001078174.1 | *SLC29A1  | N | 0.2136920 |
| NM_006416.3    | *SLC35A1  | N | 0.1092139 |
| NM_001032289.1 | *SLC35A2  | N | 0.4035703 |
| NM_005660.1    | *SLC35A2  | N | 0.2186857 |
| NM_012243.1    | SLC35A3   | N | 0.0539033 |
| NM_017945.2    | SLC35A5   | N | 0.0529277 |
| NM_005827.1    | SLC35B1   | N | 0.2833235 |
| NM_178148.1    | SLC35B2   | N | 0.2264324 |
| NM_015948.2    | SLC35B3   | N | 0.1767236 |
| NM_032826.3    | SLC35B4   | N | 0.1178945 |
| NM_018389.3    | SLC35C1   | N | 0.2895977 |
| NM_024881.3    | SLC35E1   | N | 0.0648925 |
| NM_018656.2    | SLC35E3   | N | 0.2897321 |
| NM_001001479.2 | SLC35E4   | N | 0.2493643 |
| NM_025181.2    | SLC35F5   | N | 0.7687470 |
| NM_078483.2    | SLC36A1   | N | 0.9496541 |
| NM_152313.2    | SLC36A4   | N | 0.0834017 |
| NM_207113.1    | *SLC37A3  | N | 0.2869258 |
| NM_138570.2    | *SLC38A10 | N | 0.2277148 |
| NM_018976.3    | SLC38A2   | N | 0.5425033 |
| NM_153811.1    | SLC38A6   | N | 0.1327976 |
| NM_018231.1    | SLC38A7   | N | 0.3134832 |
| NM_173514.1    | SLC38A9   | N | 0.6683261 |
| NM_139177.2    | SLC39A11  | N | 0.7887703 |
| NM_144564.4    | *SLC39A3  | N | 0.2954138 |
| NM_213568.1    | *SLC39A3  | N | 0.4621386 |
| NM_001077516.1 | SLC39A7   | N | 0.3628948 |
| NM_018375.2    | SLC39A9   | N | 0.7813367 |
| NM_001012661.1 | SLC3A2    | N | 0.8618213 |
| NM_001013251.1 | SLC3A2    | N | 0.9633075 |
| NM_001013251.1 | SLC3A2    | N | 0.1123675 |
| NM_173854.4    | SLC41A1   | N | 0.2935131 |
| NM_152346.1    | SLC43A2   | N | 0.5313866 |
| NM_080546.3    | *SLC44A1  | N | 0.5037186 |
| NM_032794.1    | SLC44A4   | N | 0.3700385 |
| NM_032034.2    | SLC4A11   | N | 0.2116575 |
| NM_018158.1    | SLC4A1AP  | N | 0.9707707 |
| NM_133478.2    | SLC4A5    | N | 0.5828695 |
| NM_003615.2    | SLC4A7    | N | 0.3288379 |
| NM_145913.2    | SLC5A8    | N | 0.4965397 |
| NM_014037.2    | SLC6A16   | N | 0.7617007 |
| NM_001076785.1 | SLC7A6    | N | 0.2114797 |
| NM_001076785.1 | SLC7A6    | N | 0.4173361 |

| NM_032178.1                              | SLC7A6OS      | N                                | 0.0679866        |
|------------------------------------------|---------------|----------------------------------|------------------|
| NM_003047.2                              | SLC9A1        | N                                | 0.0613602        |
| NM_001042537.1                           | SLC9A6        | N                                | 0.3067372        |
| NM_015266.1                              | SLC9A8        | N                                | 0.2146750        |
| NM_007256.2                              | SLCO2B1       | N                                | 0.2149093        |
| <b>ATP binding cassette transporters</b> |               |                                  |                  |
| <b>ACCESSION</b>                         | <b>SYMBOL</b> | <b>FOLD-CHANGE OR REGULATION</b> | <b>ADJ.P.VAL</b> |
| NM_005502.2                              | ABCA1         | -1.410                           | 0.000919475      |
| NM_001089.1                              | ABCA3         | -1.395                           | 0.000936566      |
| NM_000927.3                              | ABCB1         | -1.249                           | 0.0085752        |
| NM_012089.1                              | ABCB10        | -1.316                           | 0.001893257      |
| NM_019624.2                              | *ABCB9        | -1.853                           | 0.000236479      |
| NM_005688.2                              | ABCC5         | -1.352                           | 0.001139969      |
| NM_001023587.1                           | ABCC5         | -1.323                           | 0.000992726      |
| NM_000350.2                              | ABCA4         | 1.138                            | 0.046183334      |
| NM_004299.3                              | ABCB7         | 1.273                            | 0.001864064      |
| NM_001040876.1                           | *ABCE1        | 1.225                            | 0.016003879      |
| NM_001025091.1                           | ABCF1         | 1.329                            | 0.002154351      |
| NM_001025091.1                           | ABCF1         | 1.735                            | 1.04E-05         |
| NM_007188.2                              | ABCB8         | +                                | 0.014799813      |
| NM_000033.2                              | ABCD1         | +                                | 7.68E-06         |
| NM_172232.1                              | ABCA5         | N                                | 0.47307086       |
| NM_080284.2                              | ABCA6         | N                                | 0.744457735      |
| NM_080284.2                              | ABCA6         | N                                | 0.315224209      |
| NM_019112.3                              | ABCA7         | N                                | 0.114068852      |
| NM_005689.1                              | ABCB6         | N                                | 0.598213725      |
| NM_019624.2                              | *ABCB9        | N                                | 0.051314322      |
| NM_019900.2                              | ABCC1         | N                                | 0.149614312      |
| NM_033450.2                              | ABCC10        | N                                | 0.361807389      |
| NM_003786.2                              | ABCC3         | N                                | 0.089941544      |
| NM_005845.2                              | ABCC4         | N                                | 0.950285958      |
| NM_001040876.1                           | *ABCE1        | N                                | 0.091359441      |
| NM_005692.3                              | ABCF2         | N                                | 0.310193982      |
| NM_007189.1                              | ABCF2         | N                                | 0.370861094      |
| NM_018358.2                              | ABCF3         | N                                | 0.176371222      |
| NM_016818.2                              | ABCG1         | N                                | 0.086265054      |
| NM_016818.2                              | ABCG1         | N                                | 0.333291472      |

- Indicates downregulation below detection levels in cytokine-treated cells, + indicates upregulation from below detection levels in control cells, N indicates no changes between control and cytokine-treated cells and \* indicates transcript showing different results with different probes.
